# Supplementary material for: Insulin resistance drives hepatic de novo lipogenesis in nonalcoholic fatty liver disease
Source: JCI journal article supplement (doi:10.1172/jci134165), 2019-12-05
Supplement: sd1 [file 1]

### Supplemental Data

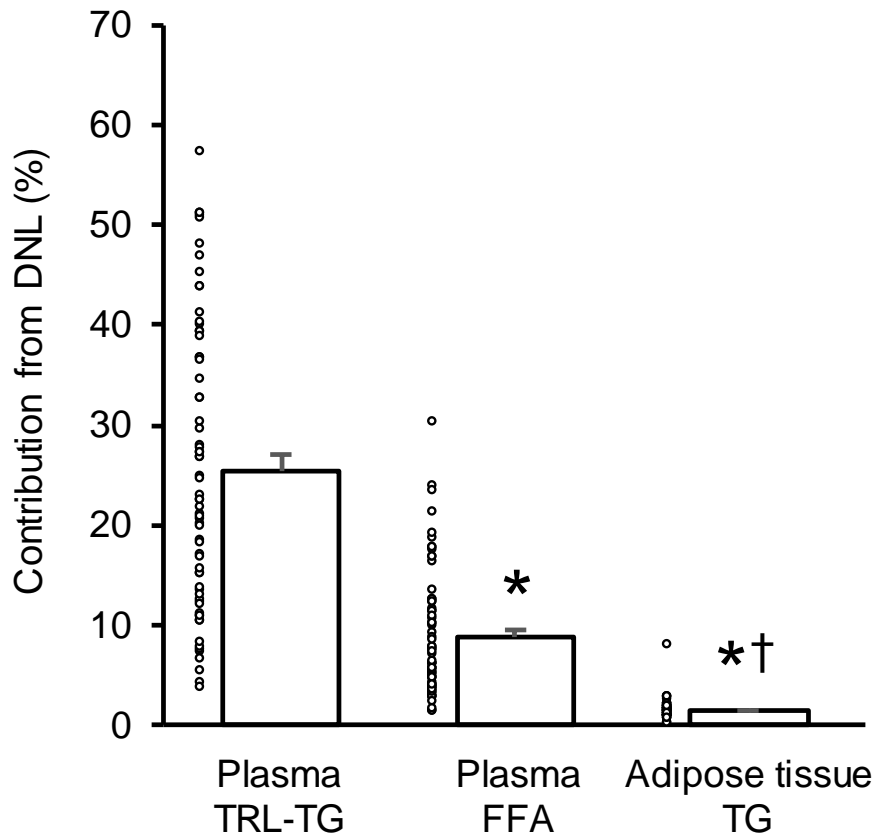

**Supplemental Figure 1.** Relative contribution of *de novo* lipogenesis (DNL) to palmitate in plasma triglyceride-rich lipoprotein-triglycerides (TRL-TG), plasma free fatty acids (FFA) and adipose tissue triglycerides (TG).

Values are means  $\pm$  SEM (n=67). Circles next to each bar represent the values for each participant. One-way repeated measures analysis of variance was used to compare contributions from DNL within each pool with Tukey's post-hoc procedure used to locate significant mean differences.

\*Value significantly different from Plasma TRL-TG value,  $P < 0.01$ .

†Value significantly different from Plasma FFA value,  $P < 0.01$ .

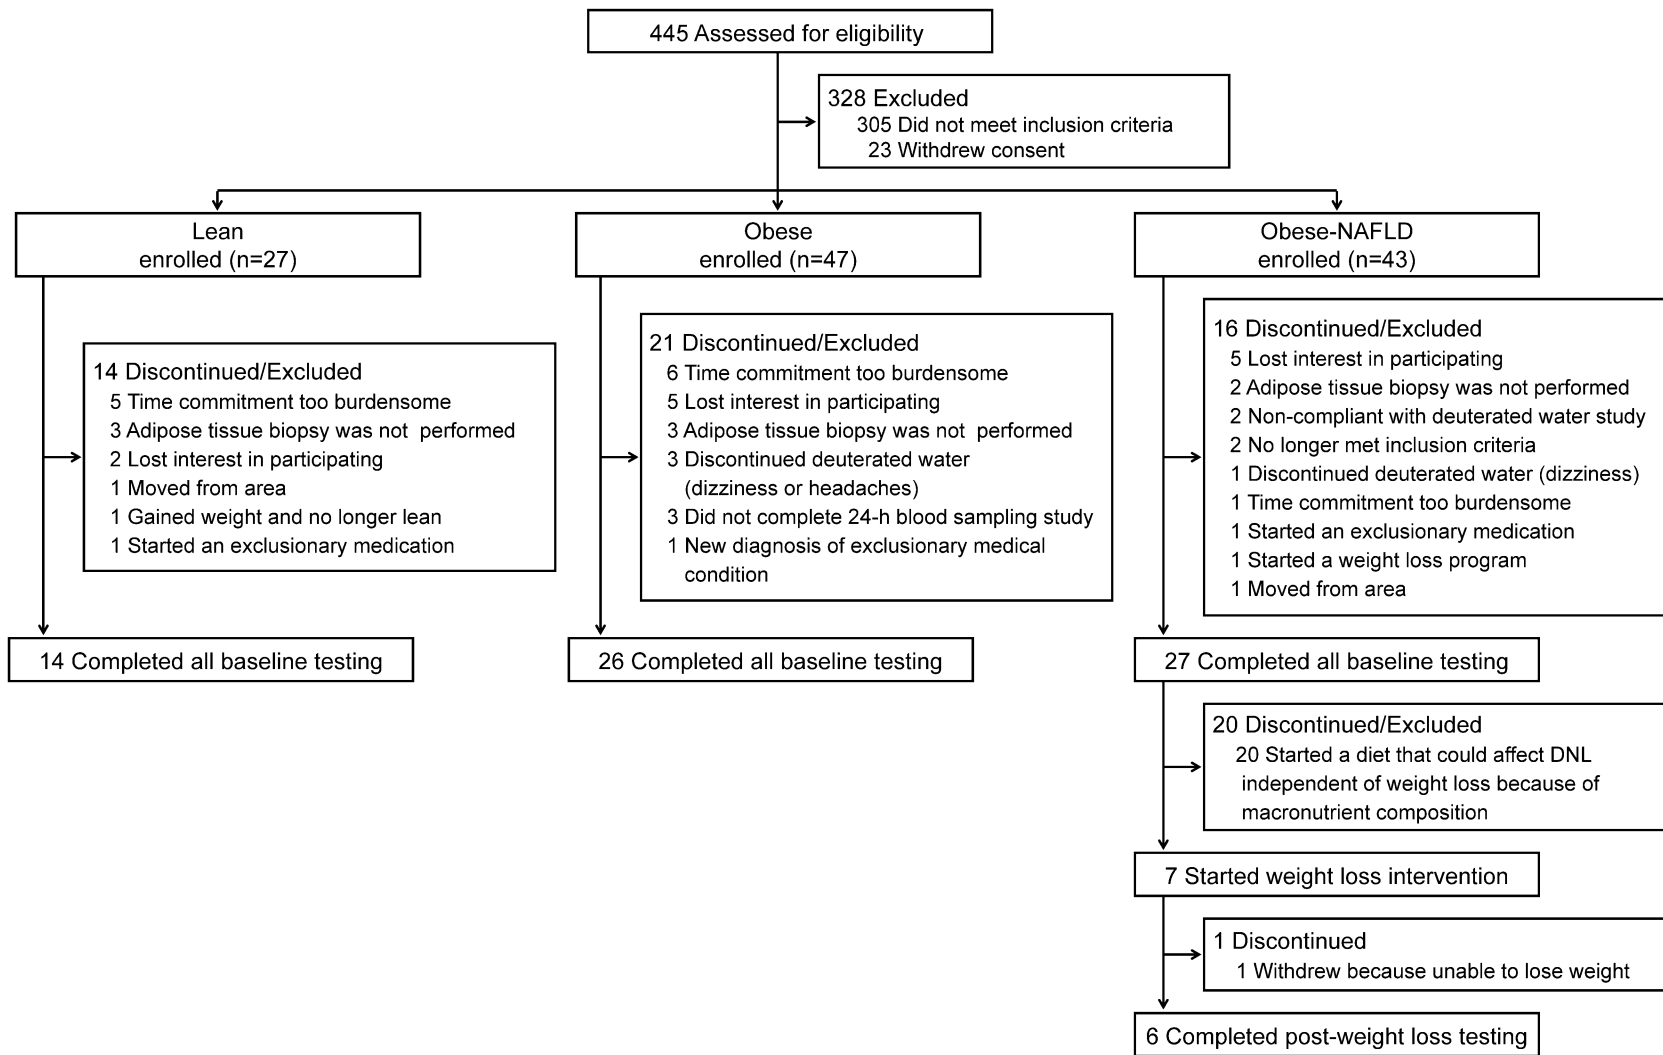

**Supplemental Figure 2.** Study flow chart.

Abbreviations: DNL=*de novo* lipogenesis; NAFLD=non-alcoholic fatty liver disease.
